# Supplementary material for: Safety and Efficacy of High-Dose Intravenous Ferric Carboxymaltose for the Management of Iron Deficiency Anemia in Pregnancy: A Retrospective Study at a Tertiary Care Center in Japan
Source: Research Square preprint supplement (doi:10.21203/rs.3.rs-8611806/v1), 2026-01-23
Supplement: Supplementary file 1 [file 1623f8ba53f17685fce25c9a.xlsx]

## Sheet: Sheet1
	Table S1. Individual clinical data of five cases with same-day autologous blood donation and ferric carboxymaltose administration
	Case	Age (years)	Gravidity and Parity	Condition	Delivery mode	No. of FCM administrations with autologous blood donation	GA at first FCM administration (weeks)	GA at delivery (weeks)	Hb before FCM (g/dL)	MCV before FCM (fL)	Hb at delivery (g/dL)	MCV at delivery (fL)	Estimated blood loss at delivery (mL)
	1	34	G1P0	Twin pregnancy	Cesarean section	1	36	37	10.3	87.8	10.8	90.8	435
	2	40	G2P0	Twin pregnancy	Cesarean section	1	36	37	10.5	85.2	10.3	84.6	2980
	3	39	G3P1	Placenta previa	Cesarean section	2	35	37	11.1	102.4	10	102.3	640
	4	36	G3P1	Clinically significant irregular antibodies	Cesarean section	2	33	37	10.7	89.5	11.2	91.9	420
	5	31	G4P2	Placenta previa	Cesarean section	2	35	37	10.3	83.3	10.2	88	570
	Individual patient-level data are shown.
	FCM, ferric carboxymaltose; GA, gestational age; Hb, hemoglobin; MCV, mean corpuscular volume.
